# Supplementary material for: Discovering the Mutational Profile of Early Colorectal Lesions: A Translational Impact
Source: MDPI journal article supplement (doi:10.3390/cancers13092081), 2021-04-25
Supplement: s1 [file s1]

# Discovering the Mutational Profile of Early Colorectal Lesions: A Translational Impact

Chiara Alquati, Anna Prossomariti, Giulia Piazzzi, Francesco Buttitta, Franco Bazzoli, Luigi Laghi and Luigi Ricciardiello

**Table S1.** Studies evaluating cumulative CRC risk in Lynch syndrome in relation to germline mutations in MMR gene.

| Study Population | Germline Mutation | Associated Somatic Mutations                                                                                                                                                                                         | Median Follow-up period | Cumulative CRC risk | Notes                                                                                                                                                                                               | References |
|------------------|-------------------|----------------------------------------------------------------------------------------------------------------------------------------------------------------------------------------------------------------------|-------------------------|---------------------|-----------------------------------------------------------------------------------------------------------------------------------------------------------------------------------------------------|------------|
| 29 patients      | <i>MSH2</i>       | <i>APC</i> (75%);<br><i>CTNNB1</i> (7%)                                                                                                                                                                              |                         | 11.4%               |                                                                                                                                                                                                     |            |
| 16 patients      | <i>MLH1</i>       | <i>APC</i> (11%);<br><i>CTNNB1</i> (50%)                                                                                                                                                                             | 7.8 years               | 11.3%               | Small sample size for <i>MSH6</i> germline mutation                                                                                                                                                 | [49]       |
| 3 patients       | <i>MSH6</i>       | <i>APC</i> (100%)                                                                                                                                                                                                    |                         | 4.7%                |                                                                                                                                                                                                     |            |
| 159 patients     | <i>MSH2</i>       | NA                                                                                                                                                                                                                   |                         | 17.8%               | Small sample size for <i>PMS2</i> germline mutation.                                                                                                                                                |            |
| 98 patients      | <i>MLH1</i>       | NA                                                                                                                                                                                                                   | 6.5 years               | 17.7%               |                                                                                                                                                                                                     |            |
| 103 patients     | <i>MSH6</i>       | NA                                                                                                                                                                                                                   |                         | 8.5%                | The percentages refer to the cumulative risk of CRC by 70 years of age                                                                                                                              | [50]       |
| 21 patients      | <i>PMS2</i>       | NA                                                                                                                                                                                                                   |                         | 0%                  |                                                                                                                                                                                                     |            |
| 1060 patients    | <i>MSH2</i>       | NA                                                                                                                                                                                                                   |                         | 43%*                | The study evaluated the <b>cumulative incidence (*)</b> of CRC at 75 years of age. The study analyzed also endometrial, ovarian, urinary tract, prostate, brain and upper gastrointestinal cancers. |            |
| 1473 patients    | <i>MLH1</i>       | NA                                                                                                                                                                                                                   |                         | 46%*                |                                                                                                                                                                                                     |            |
| 462 patients     | <i>MSH6</i>       | NA                                                                                                                                                                                                                   | NA                      | 15%*                |                                                                                                                                                                                                     | [51]       |
| 124 patients     | <i>PMS2</i>       | NA                                                                                                                                                                                                                   |                         | 0%*                 |                                                                                                                                                                                                     |            |
| 18 patients      | <i>MSH2</i>       | <i>CTNNB1</i> 6%; <i>KRAS</i> 39%; <i>PIK3CA</i> 39%; <i>APC</i> 33%; <i>TP53</i> 28%; <i>FBXW7</i> 17%;<br><i>CTNNB1</i> 58%; <i>KRAS</i> 29%; <i>PIK3CA</i> 25%; <i>APC</i> 13%; <i>TP53</i> 25%; <i>FBXW7</i> 17% |                         |                     |                                                                                                                                                                                                     |            |
| 24 patients      | <i>MLH1</i>       | <i>CTNNB1</i> 0%; <i>KRAS</i> 50%; <i>PIK3CA</i> 25%; <i>APC</i> 30%; <i>TP53</i> 25%; <i>FBXW7</i> 20%;                                                                                                             | NA                      | NA                  |                                                                                                                                                                                                     | [52]       |
| 24 patients      | <i>PMS2</i>       | <i>CTNNB1</i> 0%; <i>KRAS</i> 50%; <i>PIK3CA</i> 25%; <i>APC</i> 30%; <i>TP53</i> 25%; <i>FBXW7</i> 20%;                                                                                                             |                         |                     |                                                                                                                                                                                                     |            |

NA (Not Available); \* data refer to cumulative incidence.

**Table S2.** Studies evaluating somatic mutations in sporadic CRC.

| Study population                                           | Samples analyzed                                                                                                           | Study Methods                      | Frequent mutated genes and candidate driver genes                                                                                                                                                                                                                                                                                                                                                                                                                                                                                | Notes                                                                                                                                 | References |
|------------------------------------------------------------|----------------------------------------------------------------------------------------------------------------------------|------------------------------------|----------------------------------------------------------------------------------------------------------------------------------------------------------------------------------------------------------------------------------------------------------------------------------------------------------------------------------------------------------------------------------------------------------------------------------------------------------------------------------------------------------------------------------|---------------------------------------------------------------------------------------------------------------------------------------|------------|
| 58 patients with colorectal adenomas (Retrospective study) | 17 invasive adenocarcinomas                                                                                                | Target NGS                         | <i>APC</i> (76.5%), <i>KRAS</i> (41.1%), <i>SYNE1</i> (47.1%), <i>NOTCH4</i> (17.6%), <i>TCF7L2</i> (17.6%), <i>GNAS</i> (5.9%), <i>FBXW7</i> (5.9%), <i>TAF1L</i> (17.6%), <i>KMT2D</i> (17.6%), <i>BCL2</i> (29.4%), <i>KMT2C</i> (17.6%), <i>PKHD1</i> (5.9%), <i>RNF213</i> (5.9%), <i>CSDM3</i> (5.9%), <i>TP53</i> (35.3%), <i>BLNK</i> (23.5%), <i>HNF1A</i> (0%), <i>LRP1B</i> (17.6%)                                                                                                                                   | The percentages refer to adenocarcinomas                                                                                              | [58]       |
| 2 CRC patients                                             | 96 single cells from CRC                                                                                                   | single-cell WES and bulk WES       | <i>LAMA1</i> , <i>ADCY3</i>                                                                                                                                                                                                                                                                                                                                                                                                                                                                                                      | Small sample size                                                                                                                     | [64]       |
| NA                                                         | 11 colorectal adenoma-carcinoma pairs                                                                                      | WES                                | <i>APC</i> , <i>CTNNB1</i> , <i>FERD3L</i> , <i>KRAS</i> , <i>TP53</i> , <i>TMPRSS13</i> , <i>NRAS</i> , <i>KRTAP5-1</i> , <i>OR2T35</i> , <i>FOXC1</i>                                                                                                                                                                                                                                                                                                                                                                          | Data on gastric cancer not included                                                                                                   | [59]       |
| NA                                                         | 47 MSI CRCs and 64 MSI/MMR-mutated CRCs from Hong Kong cohort; 57 TCGA MSI CRCs; 391 TCGA MSS CRCs; 137 Giannakis MSS CRCs | WES, Target Gene Sanger Sequencing | <i>RNF43</i> (79.6% MSI CRCs <i>MLH1</i> met; 35.5% MSI CRCs <i>MLH1</i> unmet; 3.03% MSS CRCs); <i>BRAFV600E</i> (67.79% MSI CRCs <i>MLH1</i> met; 4.4% MSI CRCs <i>MLH1</i> unmet; 5.94% MSS CRCs); <i>KRAS</i> (57.5% MSI CRCs <i>MLH1</i> unmet; 11.86% MSI CRCs <i>MLH1</i> met); <i>APC</i> (50% MSI CRCs <i>MLH1</i> unmet; 23% MSI CRCs <i>MLH1</i> met); <i>TP53</i> (33.3% MSI CRCs <i>MLH1</i> unmet; 30.8% MSI CRCs <i>MLH1</i> met); <i>CTNNB1</i> (20% MSI CRCs <i>MLH1</i> unmet; 3.38% MSI CRCs <i>MLH1</i> met) | <i>TP53</i> and <i>APC</i> mutations evaluated in TCGA MSI CRCs cohort only. Differences between MSI and MSS CRCs were not described. | [72]       |
| NA                                                         | 31 <i>BRAF</i> -mutated/MSS carcinomas                                                                                     | Sanger sequencing                  | <i>RNF43</i> (29%)                                                                                                                                                                                                                                                                                                                                                                                                                                                                                                               | The study described only the relationship between <i>BRAF</i> and <i>RNF43</i> mutations                                              | [73]       |
| NA                                                         | 80 <i>BRAF</i> -mutant cancers (50 MSI, 30 MSS); 30 <i>BRAF</i> wild-type cancers                                          | Targeted amplicon sequencing       | <i>APC</i> (70% <i>BRAF</i> wild-type cancers; 40% MSI <i>BRAF</i> -mutated cancers; 20% MSS <i>BRAF</i> -mutated cancers)                                                                                                                                                                                                                                                                                                                                                                                                       | Only <i>APC</i> mutations were analyzed in this study                                                                                 | [79]       |

MSI (Microsatellite Instability Pathway); MSS (Microsatellite Stable); WES (Whole-Exome Sequencing); NGS (Next-Generation Sequencing); *MLH1* met (*MLH1*-methylated); *MLH1* unmet (*MLH1*-unmethylated); NA (Not Available). The frequency of mutations (%) is shown for those studies that have reported them.
